# Supplementary material
Source: PubMed Central journal article supplement (PMC4426318)
Supplement: Supp_Figure1.pdf [file Supp_Figure1.pdf]

## Supplementary Data

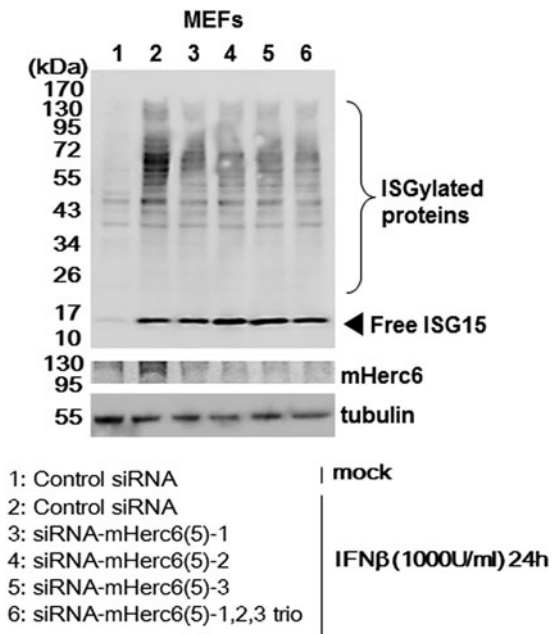

**SUPPLEMENTARY FIG. S1.** MEFs were transfected with control-siRNA or siRNAs against mouse Herc6. At 48 h after siRNAs transfection, mouse IFN- $\beta$  were treated for 24 h as indicated and then subjected to Western blotting using anti-tubulin, ISG15 antibody (CST#2743), and Herc6 antibody. IFN, interferon; MEFs, mouse embryonic fibroblast cells.
