# Supplementary material
Source: PubMed Central journal article supplement (PMC4426318)
Supplement: Supp_Figure2.pdf [file Supp_Figure2.pdf]

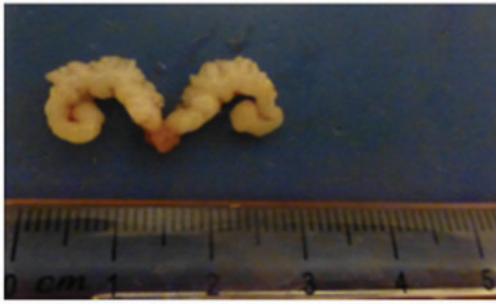

WT

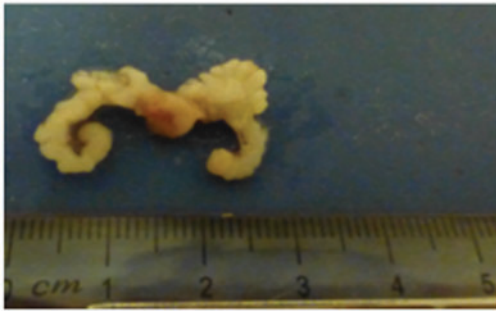

UBE1L-/-

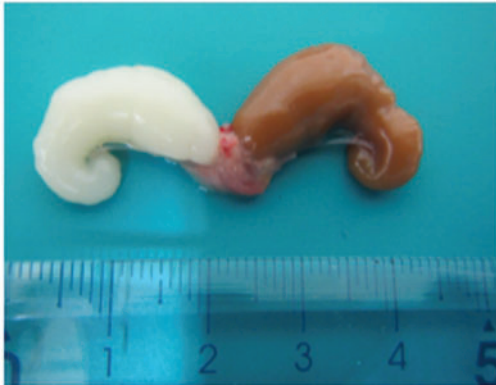

Herc6-/-

**SUPPLEMENTARY FIG. S2.** The representative seminal vesicles of C57/BL6 background WT, UBE1L knockout, and Herc6 knockout mouse at 90 weeks after birth. Seminal hypertrophy was defined as above at least 0.04 g seminal vesicle/g body weight.
